# Supplementary material for: Revisiting the thermal decomposition mechanism of MAPbI3
Source: Royal Society of Chemistry journal article supplement (doi:10.1039/d4cp01318b), 2024-01-01
Supplement: d4cp01318b1.pdf [file d4cp01318b1.pdf]

## Supporting Information

### Revisiting the Thermal Decomposition Mechanism of MAPbI<sub>3</sub>

Weijie Yang<sup>a,b,c</sup>, Ruiyang Shi<sup>a,b,c</sup>, Huan Lu<sup>a,b,c</sup>, Kailong Liu<sup>a,b,c</sup>, Qingqi Yan<sup>a,b,c</sup>, Yang Bai<sup>a,b,c</sup>, Xunlei Ding<sup>d,e</sup>,  
Hao Li<sup>\*,f</sup>, and Zhengyang Gao<sup>\*a,b,c</sup>

<sup>a</sup> Department of Power Engineering, North China Electric Power University, Baoding 071003, Hebei, China.

<sup>b</sup> Hebei Key Laboratory of Low Carbon and High-Efficiency Power Generation Technology, North China Electric Power University, Baoding 071003, Hebei, China.

<sup>c</sup> Baoding Key Laboratory of Low Carbon and High-Efficiency Power Generation Technology, North China Electric Power University, Baoding 071003, Hebei, China.

<sup>d</sup> Institute of Clusters and Low Dimensional Nanomaterials, School of Mathematics and Physics, North China Electric Power University, Beijing 102206, P. R. China.

<sup>e</sup> Hebei Key Laboratory of Physics and Energy Technology, North China Electric Power University, Baoding 071000, Hebei, P. R. China.

<sup>f</sup> Advanced Institute for Materials Research (WPI-AIMR), Tohoku University, Sendai 980–8577, Japan

#### \* Corresponding Author

Hao Li ([li.hao.b8@tohoku.ac.jp](mailto:li.hao.b8@tohoku.ac.jp))

Zhenyang Gao ([gaozhyang@163.com](mailto:gaozhyang@163.com))

The Gibbs free energies were obtained according to the equation:

$$G = E_{ele} + ZPE - TS \quad (S1)$$

where  $E_{ele}$  is the electronic energy of the system in the ground state, T is the temperature (herein we set it to 300 K), S is the entropy of the system obtained from vibrational frequency, and ZPE is the zero-point energy correction.

The reaction energy barriers ( $G_b$ ) were calculated according to the following equation:

$$G_b = G_{TS} - G_{IS} \quad (S2)$$

where  $G_{IS}$  and  $G_{TS}$  are Gibbs free energies of the initial and transition states, respectively.

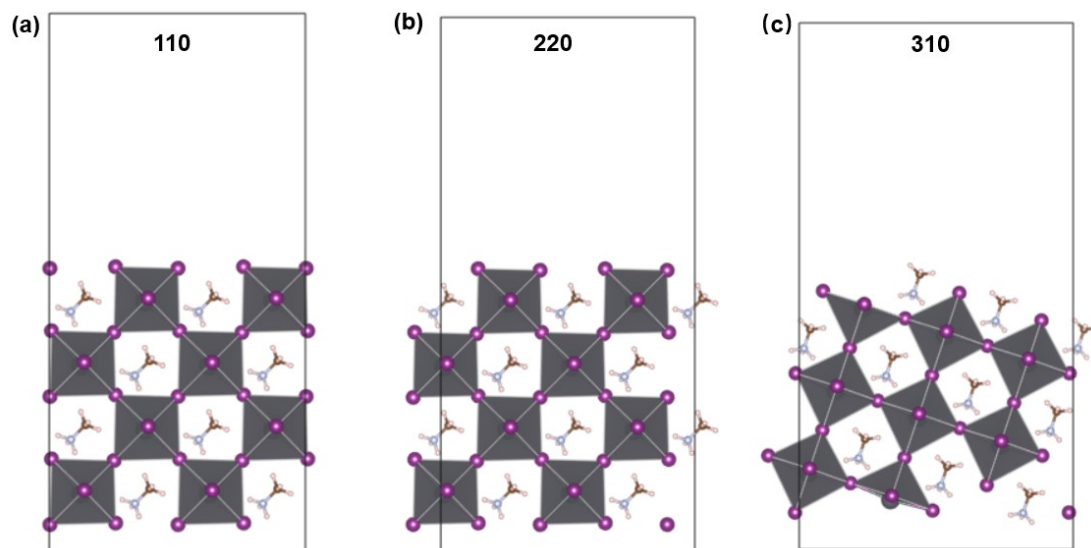

**Figure S1** The front views of the optimized MAPbI<sub>3</sub> surfaces. (a) (110) surface; (b) (220) surface; (c) (310) surface.

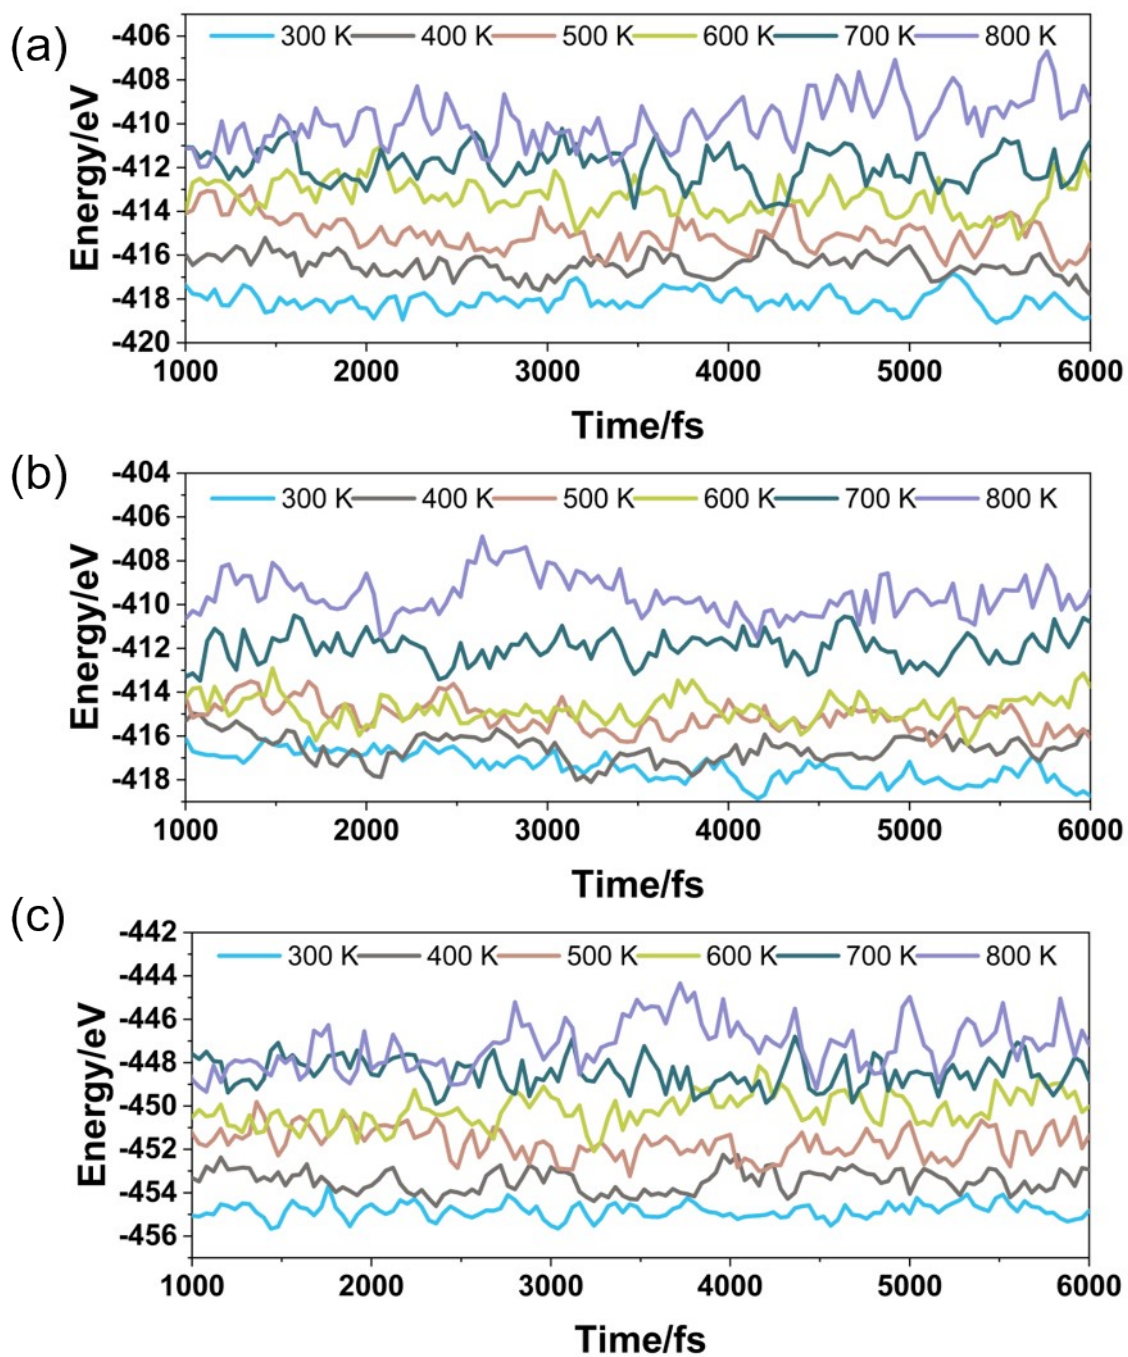

**Figure S2** AIMD simulations: energies of MAPbI<sub>3</sub> from 300 to 800 K. (a) (110) surface; (b) (220) surface; (c) (310) surface.

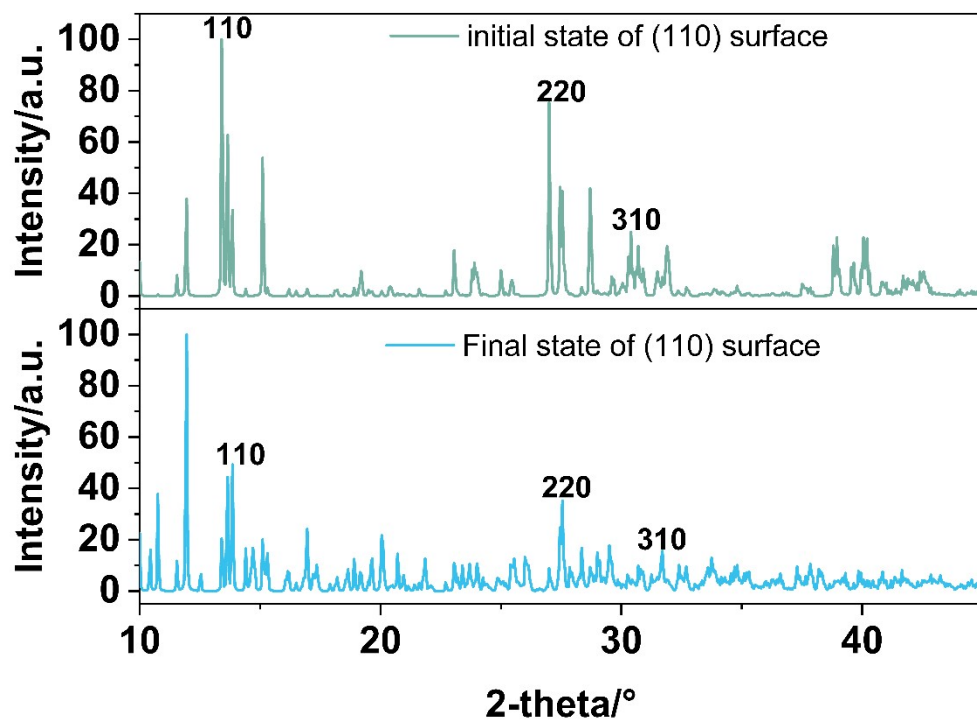

Figure S3 The XRD of (110) surface at 600 K

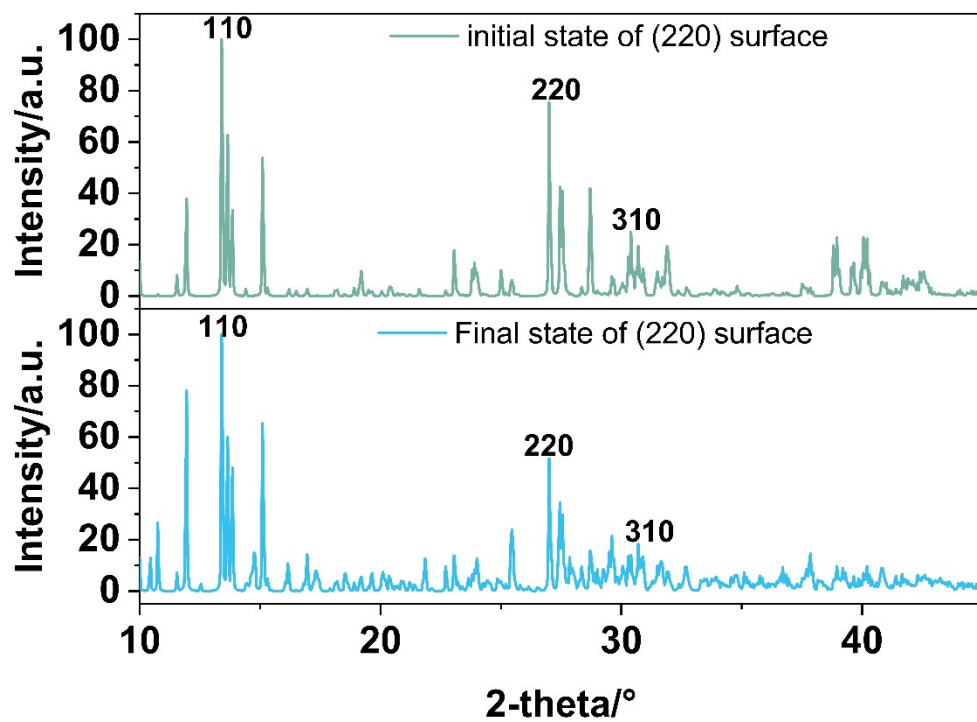

Figure S4 The XRD of (220) surface at 600 K

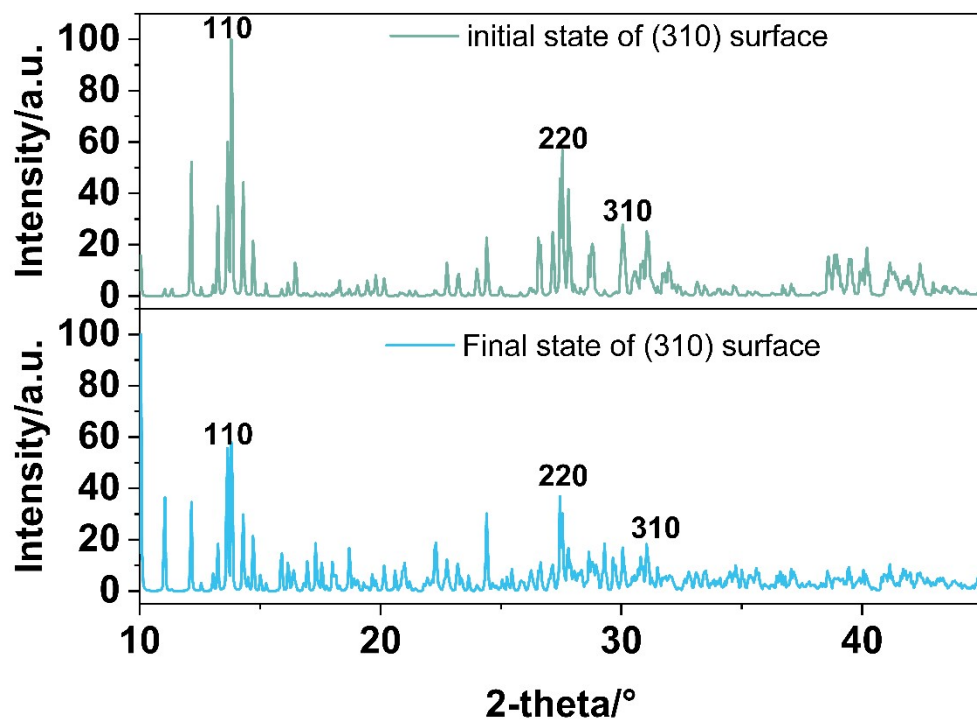

Figure S5 The XRD of (310) surface at 600 K
